# Supplementary material for: Ion concentration polarization for pre-concentration of biological samples without pH change
Source: Royal Society of Chemistry journal article supplement (doi:10.1039/c6an02152b), 2016-01-01
Supplement: c6an02152b1.pdf [file c6an02152b1.pdf]

## **Supporting Information for:**

### **Ion concentration polarization for pre-concentration of biological samples without pH change**

Youngkyu Cho,<sup>a</sup> Junghyo Yoon,<sup>b</sup> David Wonbin Lim,<sup>b</sup> Jaehoon Kim,<sup>b</sup> Jeong Hoon Lee,<sup>c</sup> and Seok Chung<sup>\*a,b</sup>

*<sup>a</sup>Department of IT convergence, Korea University, 145 Anam-ro, Seoungbuk-gu, Seoul 02841, Korea*

*<sup>b</sup>School of Mechanical Engineering, Korea University, 145 Anam-ro, Seoungbuk-gu, Seoul 02841, Korea*

*<sup>c</sup>Department of Electrical Engineering, Kwangwoon University, 20 Gwangun-ro, Nowon-gu, Seoul 01897, Korea*

\*Author for correspondence : [sidchung@korea.ac.kr](mailto:sidchung@korea.ac.kr)

#### **Contents:**

Fig. S1 : Fabrication of the pre-concentration device.

Fig. S2 : Peak current in various electric fields and distribution of Ohmic, limiting and over-limiting ranges.

Table S1 : Comparing with previous pre-concentration methods using ion concentration polarization (ICP).

Table S2 : Comparison of Pressure driven flow and electroosmotic flow (EOF) in main channel

Table S3 : Theoretical and experimental value chart after buffer drainage during single channel and dual channel concentrator operating and theoretical value equation.

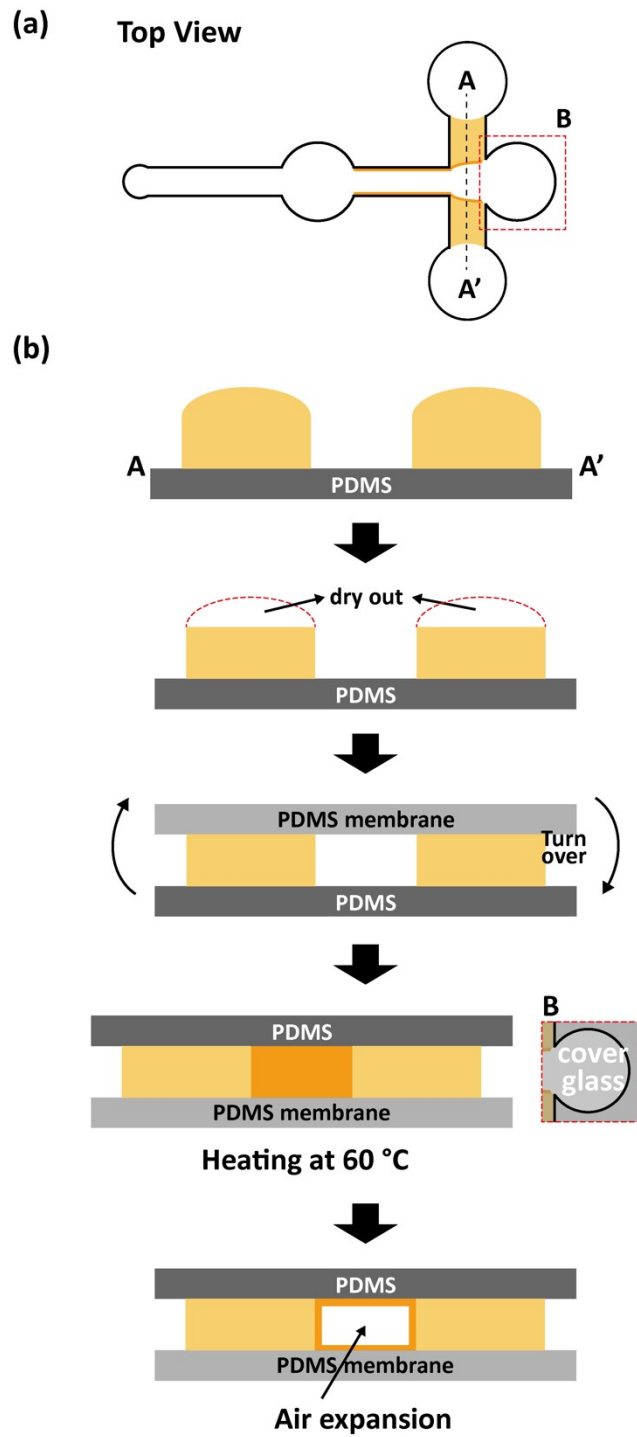

Fig. S1 (a) Top view of a single channel pre-concentration device. (b) Fabrication process of filling and coating the Nafion in the device.

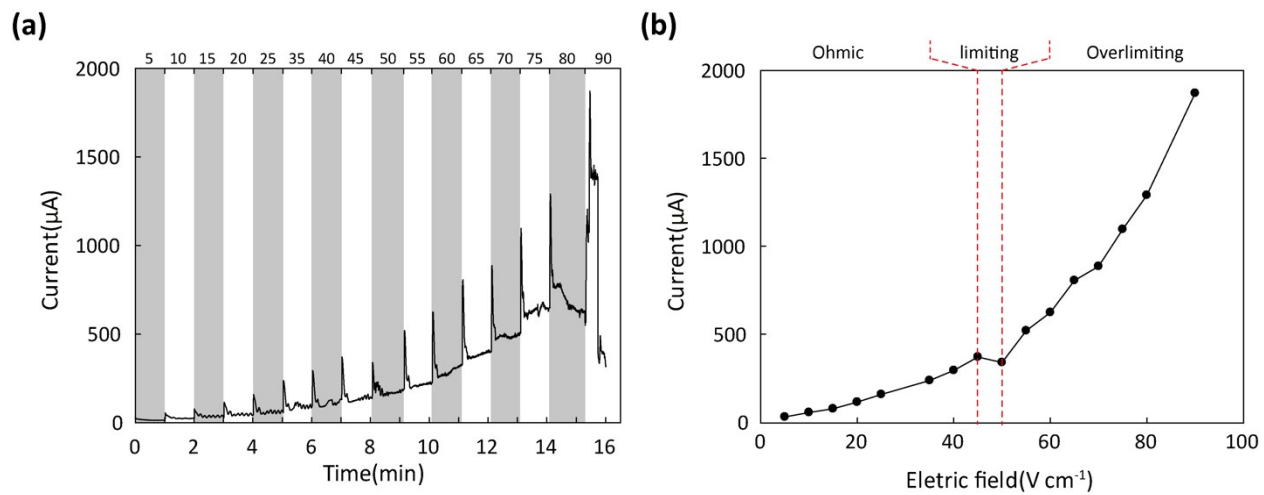

Fig S2. (a) Current pattern in each electric field during 60 seconds. Above number of graph mean electric field,  $\text{V cm}^{-1}$ . (b) Peak current in each electric field and distribution of Ohmic, limiting and over-limiting regimes.

|                                                  | Method                                          | Initial volume   | Concentration fold (time)          | Measuring              | Ref.  |
|--------------------------------------------------|-------------------------------------------------|------------------|------------------------------------|------------------------|-------|
| <b>On chip analysis (straight micro-channel)</b> | without ground buffer channel                   | 0.054 $\mu$ L    | $\sim 10^3$<br>(20minutes)         | Fluorescence intensity | 1     |
|                                                  |                                                 | 0.08 $\mu$ L     | $\sim 10^6$<br>(60minutes)         | Fluorescence intensity | 2     |
|                                                  | with ground buffer channel                      | 0.05 $\mu$ L     | $\sim 10^4$<br>(60minutes)         | Fluorescence intensity | 3     |
|                                                  |                                                 | 0.038 $\mu$ L    | $\sim 10^4$<br>(5minutes)          | Fluorescence intensity | 4     |
|                                                  |                                                 | 2 $\mu$ L        | $\sim 10^4$<br>(22minutes)         | Fluorescence intensity | 5     |
|                                                  |                                                 | 0.013 $\mu$ L    | $\sim 500$<br>(15minutes)          | Fluorescence intensity | 6     |
|                                                  |                                                 | < 1 $\mu$ L      | $\sim 100$<br>(30minutes)          | Fluorescence intensity | 7     |
|                                                  |                                                 | < 1 $\mu$ L      | $\sim 4 \cdot 10^3$<br>(30minutes) | Fluorescence intensity | 8     |
|                                                  |                                                 | 0.042 $\mu$ L    | $\sim 10^3$<br>(10minutes)         | Fluorescence intensity | 9     |
| <b>Extractable</b>                               | Straight channel with ground buffer channel     | 0.05 $\mu$ L/min | $\sim 20$<br>(200minutes)          | Cell count             | 10,11 |
|                                                  | Draining buffer concentration                   | 100 $\mu$ L      | $\sim 4$<br>(15minutes)            | ELISA                  | 12    |
|                                                  | Draining buffer concentration without pH change | 40 $\mu$ L       | $\sim 3.3$<br>(15minutes)          | ELISA                  |       |

Table S1. Comparing with previous pre-concentration methods using ion concentration polarization (ICP). (Gray row means our developed pre-concentration method. On chip analysis method's initial volume is calculated based concentrated channel specification since the volume isn't indicated in references.)

| <b>Pressure driven flow</b> |        | <b>Electroosmotic flow(EOF)<sup>13</sup></b>                                       |                                |
|-----------------------------|--------|------------------------------------------------------------------------------------|--------------------------------|
| Flow rate : 1ul/min         |        | $V_{av} = -E\epsilon_r\epsilon_0\frac{\zeta}{\mu}$                                 |                                |
| Channel width (μm)          | 500    | E : electric field (V cm <sup>-1</sup> )                                           | 20~100                         |
| Channel height (μm)         | 170    | $\epsilon_r$ : Dielectric constant of the medium (PBS)                             | 8                              |
|                             |        | $\epsilon_0$ : The permittivity of the vacuum (C V <sup>-1</sup> m <sup>-1</sup> ) | 8.85*10 <sup>-12</sup>         |
|                             |        | $\zeta$ : Zeta potential at the shear plane (mV)                                   | -25                            |
|                             |        | $\mu$ : dynamic viscosity (N S m <sup>-2</sup> )                                   | 0.001                          |
| $V_{av}$ (μm/s)             | 196.08 | $V_{av}$ (μm/s)                                                                    | 3.54~17.7<br>*10 <sup>-3</sup> |

Table S2. Comparison of Pressure driven flow and electroosmotic flow (EOF) in main channel

|                                                  |                                                | <b>5min</b> | <b>10min</b> | <b>15min</b> | <b>20min</b> |
|--------------------------------------------------|------------------------------------------------|-------------|--------------|--------------|--------------|
| <b>Single Channel</b><br>(initial volume : 40μL) | <b>Drained volume (μL) (Theoretical value)</b> | -           | 10           | -            | 20           |
|                                                  | <b>Theoretical value (Fold)</b>                | -           | 1.33         | -            | 2            |
|                                                  | <b>Experimental value (Fold)</b>               | -           | 1.3          | -            | 2.1          |
| <b>Dual Channel</b><br>(initial volume : 40μL)   | <b>Drained volume (μL) (Theoretical value)</b> | 10          | 20           | 30           | -            |
|                                                  | <b>Theoretical value (Fold)</b>                | 1.3         | 2            | 4            | -            |
|                                                  | <b>Experimental value (Fold)</b>               | 1.1         | 2.1          | 3.3          | -            |

**Theoretical value equation**

$$Theoretical\ value(Flow) = \frac{Initial\ volume}{Initial\ volume - Drained\ volume}$$

Table S3. Theoretical and experimental value chart after buffer drainage during single channel and dual channel concentrator operating and theoretical value equation.

## Reference

- 1 S. H. Ko, Y.-A. Song, S. J. Kim, M. Kim, J. Han and K. H. Kang, *Lab Chip*, 2012, **12**, 4472-4482.
- 2 M. Kim, M. Jia and T. Kim, *Analyst*, 2013, **138**, 1370-1378.
- 3 J. H. Lee, S. Chung, S. J. Kim and J. Han, *Anal. Chem.*, 2005, **79**, 13770–13773.
- 4 J. H. Lee, Y.-A. Song and J. Han, *Lab Chip*, 2008, **8**, 596–601.
- 5 J. K. Sung and J. Han, *Anal. Chem.*, 2008, **80**, 3507–3511.
- 6 J. H. Lee and J. Han, *Microfluid. Nanofluidics*, 2010, **9**, 973–979.
- 7 V. Liu, Y.-A. Song and J. Han, *Lab Chip*, 2010, **10**, 1485–1490.
- 8 S. H. Ko, S. J. Kim, L. F. Cheow, L. D. Li, K. H. Kang and J. Han, *Lab Chip*, 2011, **11**, 1351–1358.
- 9 M. Kim and T. Kim, *Analyst*, 2013, **138**, 6007–6015.
- 10 R. Kwak, S. J. Kim and J. Han, *Anal. Chem.*, 2011, **83**, 7348–7355.
- 11 S. J. Kim, S. H. Ko, K. H. Kang and J. Han, *Nat. Nanotechnol.*, 2013, **8**, 609–609.
- 12 J. Yoon, Y. Cho, S. Han, C. S. Lim, J. H. Lee and S. Chung, *Lab Chip*, 2014, **14**, 2778–2782.
- 13 H. Mohamed, *Blood Cell – An Overv. Stud. Hematol.*, 2012, 195–226.
